# Supplementary material for: Liver fatty acid-binding protein (L-FABP) promotes cellular angiogenesis and migration in hepatocellular carcinoma
Source: PubMed Central journal article supplement (PMC4951284; doi:10.18632/oncotarget.7571), 2016-02-22
Supplement: oncotarget-07-18229-s001.pdf [file oncotarget-07-18229-s001.pdf]

## SUPPLEMENTARY FIGURES AND TABLE

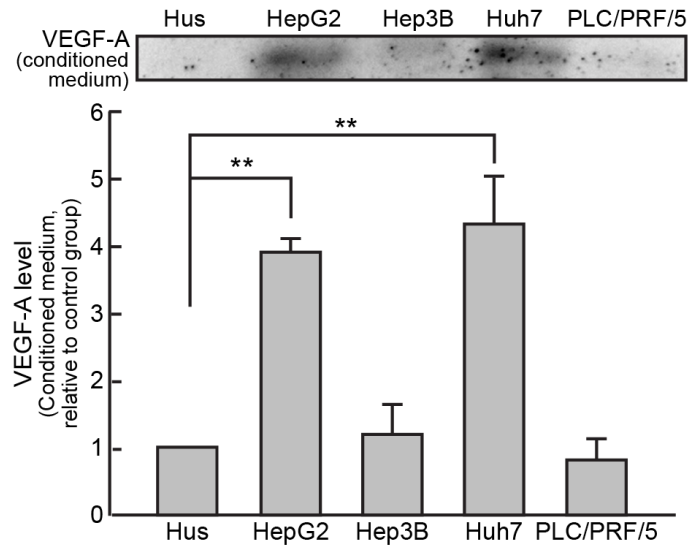

**Supplementary Figure S1: Secreted VEGF-A was abundant in the culture medium of HepG2 and Huh7 cells.** Culture medium of Hus, HepG2, Hep3B, Huh7, and PLC/PRF/5 cells was collected from a 10-cm dish ( $2 \times 10^6$  per dish for each cell line), and subjected to western blot analysis. \*\* $p < 0.01$  versus Hus cells.

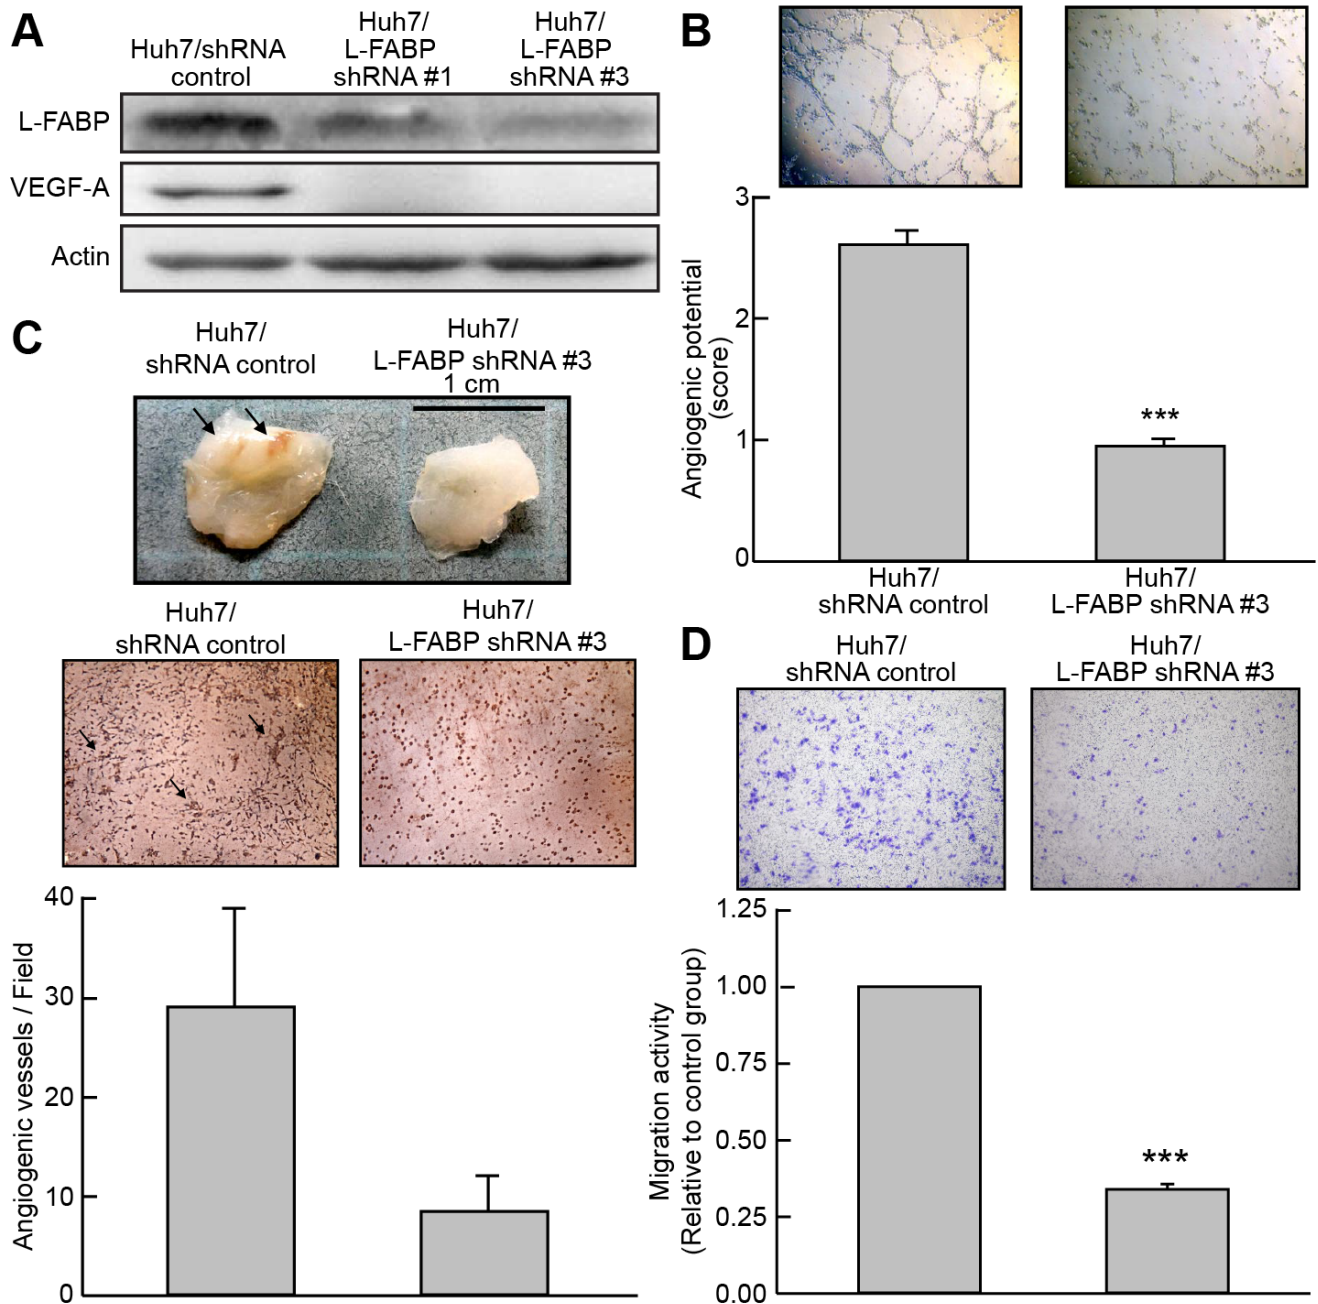

**Supplementary Figure S2: Knockdown of L-FABP in Huh7 cells reduced VEGF-A expression, angiogenic activity, and migration.** **A.** Western blot analysis of L-FABP and VEGF-A in Huh7 cells transfected with an shRNA control or L-FABP-targeting shRNA plasmids. Stable clones were screened and selected using puromycin. **B.** *In vitro* angiogenic activity (score: see *In vitro tube formation assay* in Methods for details) of L-FABP-stable knockdown Huh7 cells. Angiogenic vascular tubes were imaged at 8 h. \*\*\* $p < 0.001$  versus control. **C.** *In vivo* angiogenic activity in mice injected with Huh7/L-FABP shRNA or Huh7/shRNA control cells was assessed using a Matrigel plug assay. Left: Recovered Matrigel plugs. Arrows indicate the infiltration of blood vessels. Right: Immunohistochemical staining of CD31 (angiogenesis marker) in Matrigel plugs ( $n = 3$ ,  $p = 0.067$ ). **D.** 3D migration activity of Huh7/L-FABP shRNA stable clones seeded onto Boyden chambers and allowed to migrate for 16 h. \*\*\* $p < 0.001$  versus control.

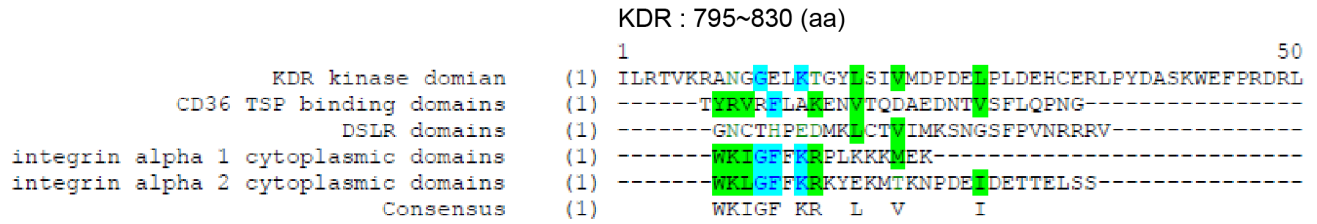

**Supplementary Figure S3: Sequence alignment of FABP-interacting domains.** Consensus sequence WKIGFXKRLXXVXXI is likely to interact with L-FABP.

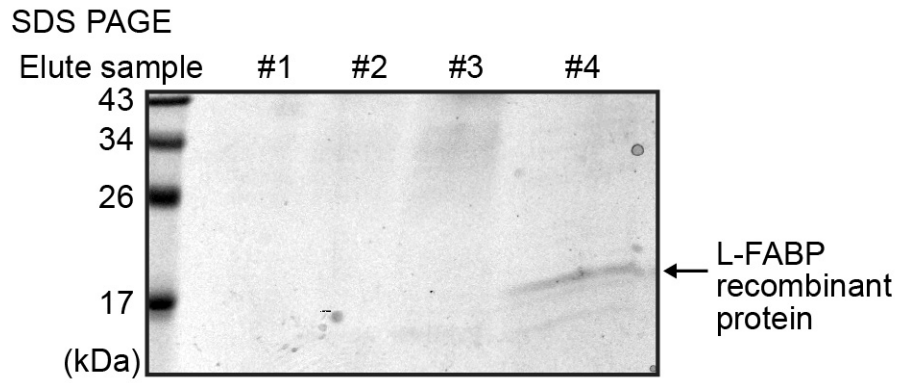

**Supplementary Figure S4: Purification of L-FABP recombinant protein.** L-FABP/V5-tagged recombinant protein was eluted by the fourth elution (with 250 mM imidazole) and subjected to SDS PAGE analysis. The size of the recombinant protein was nearly 20 kDa.

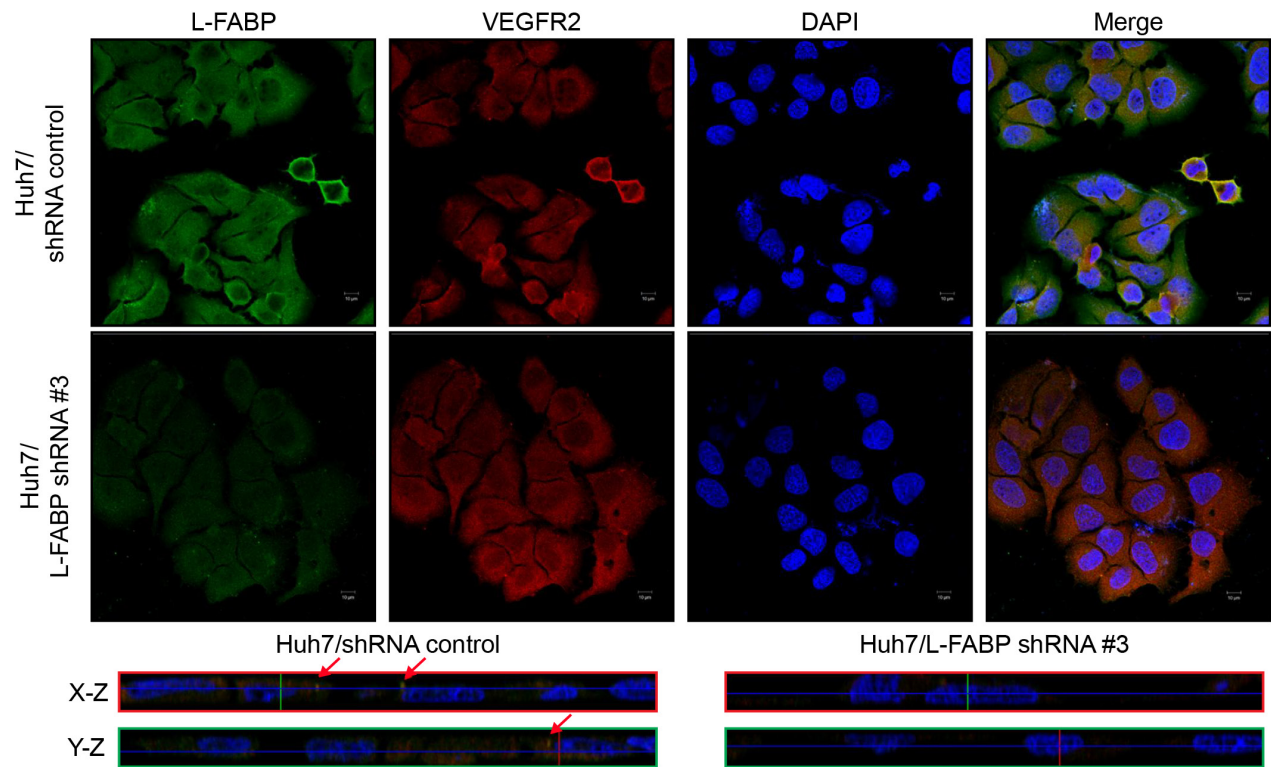

**Supplementary Figure S5: Reduced co-localization of L-FABP and VEGFR2 on the membrane in Huh7 L-FABP-stable knockdown cells. A.** Three-color confocal images of Huh7 L-FABP-stable knockdown cells fixed and stained with antibodies against VEGFR2 and L-FABP (magnification: 63 $\times$ ). Signals: green, L-FABP-Alexa 488; red, VEGFR2-Alexa 568; and blue, DAPI. The X-Z and Y-Z optical sections are shown for Huh7/shRNA control and Huh7/L-FABP shRNA cells in the lower photos. Arrows indicate co-localization of VEGFR2 and L-FABP on the apical membrane of cells.

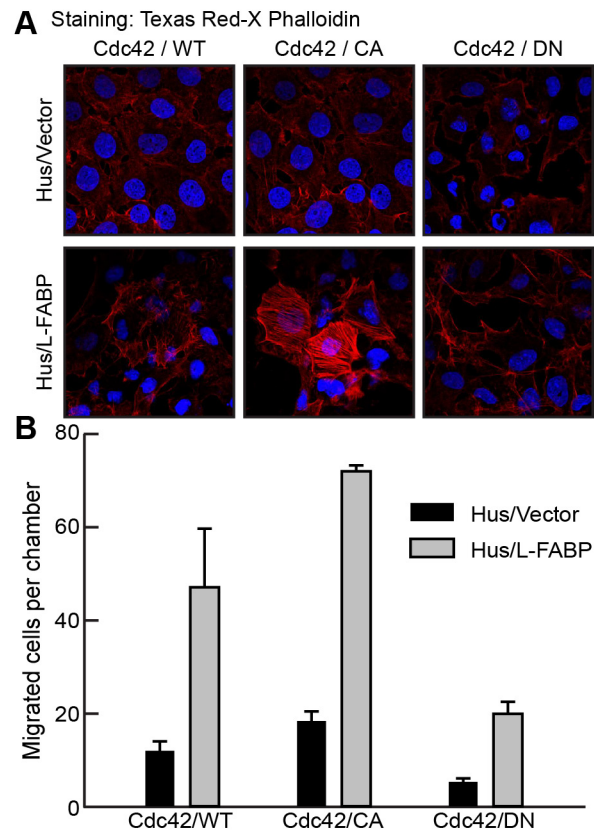

**Supplementary Figure S6: L-FABP promoted actin rearrangement and migration activity of Hus cells via cdc42.** Plasmids expressing different variants of *cdc42*, including wild-type (pRK-myc-Cdc42-wt, #12972), dominant negative (pRK-myc-Cdc42-T17N, #12973), and constitutively active (pRK-myc-Cdc42-Q61L, #12974) *cdc42*, were obtained from Addgene (Addgene, USA). Hus/L-FABP and control cells were transfected with these plasmids for 48 h, and immunofluorescence and transwell assays were performed. **A.** Cells were stained with Texas-Red-X phalloidin to study the status of actin rearrangement. **B.** The migration activity of Hus/L-FABP cells was abolished by disruption of *cdc42* activity.

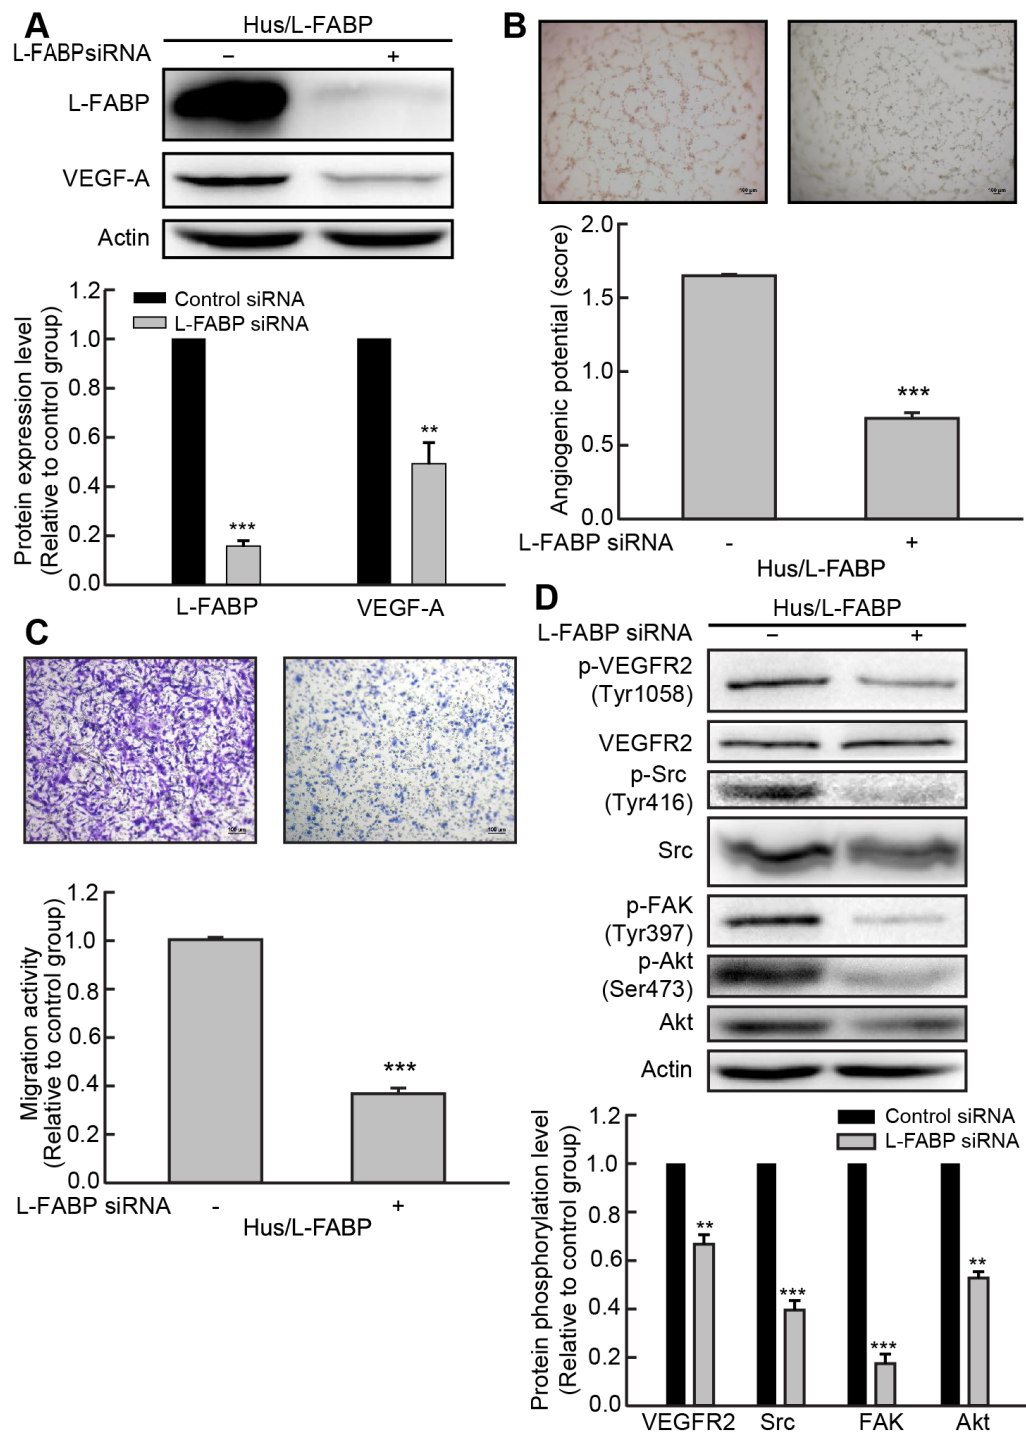

**Supplementary Figure S7: Knockdown of L-FABP in Hus/L-FABP cells reversely reduced VEGF-A expression and migration activity.** **A.** Western blot analysis of L-FABP and VEGF-A expression in Hus/L-FABP cells transfected with control siRNA or L-FABP-targeting siRNA for 24 h. \*\* $p < 0.01$ , \*\*\* $p < 0.001$  versus control siRNA groups. **B.** *In vitro* angiogenic activity (score: see *In vitro tube formation assay* in Methods for details) in L-FABP siRNA-treated cells. Angiogenic vascular tubes were imaged at 12 h. \*\*\* $p < 0.001$  versus control siRNA groups. **C.** To determine 3D migration activity, L-FABP siRNA-treated cells were seeded onto Boyden chambers and allowed to migrate for 16 h. \*\*\* $p < 0.001$  versus control siRNA groups. **D.** Western blot analysis showing phosphorylation of VEGFR2 (Tyr1058), Src (Tyr416), FAK (Tyr397), and Akt (Ser473) in Hus/L-FABP and Hus/Vector (vector-only control) cells. \*\* $p < 0.01$ , \*\*\* $p < 0.001$  versus control siRNA groups.

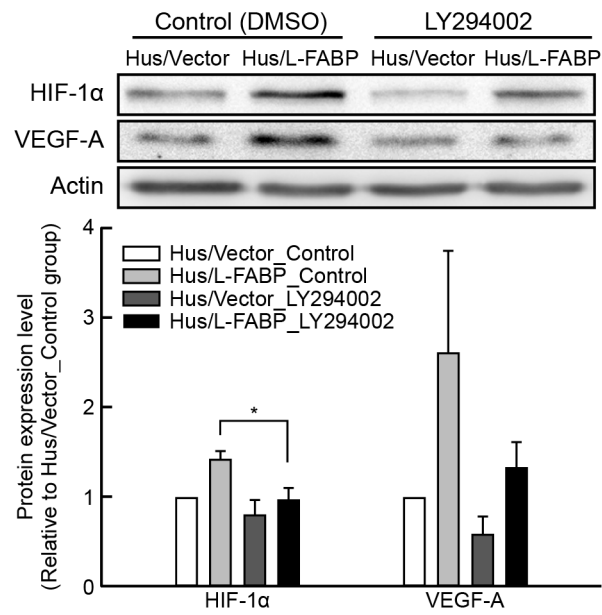

**Supplementary Figure S8: Expression of HIF-1 $\alpha$  and VEGF-A was regulated by the PI3K/Akt pathway.** Hus/L-FABP and control cells were treated with LY294002 for 12 h and the lysates were subjected to western blot analysis. \* $p < 0.05$  versus Hus/L-FABP control group.



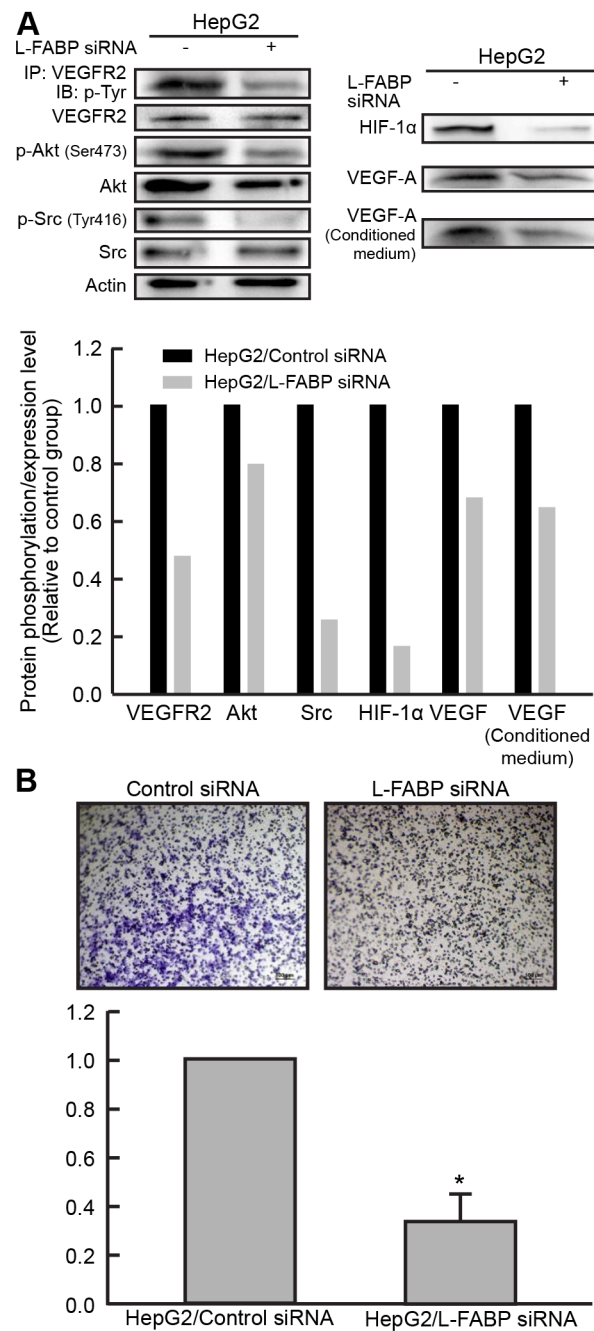

**Supplementary Figure S9: Knockdown of L-FABP in HepG2 cells reduced VEGF-A expression and migration activity.**

**A.** Western blot analysis showed that the phosphorylation of VEGFR2 (Tyr1058), Akt (Ser473), and Src (Tyr416) and the expression of HIF-1α and VEGF-A were decreased in HepG2 cells transfected with L-FABP siRNA. **B.** To determine 3D migration activity, L-FABP siRNA-treated HepG2 cells were seeded onto Boyden chambers and allowed to migrate for 24 h. \*p < 0.05 versus control siRNA groups.

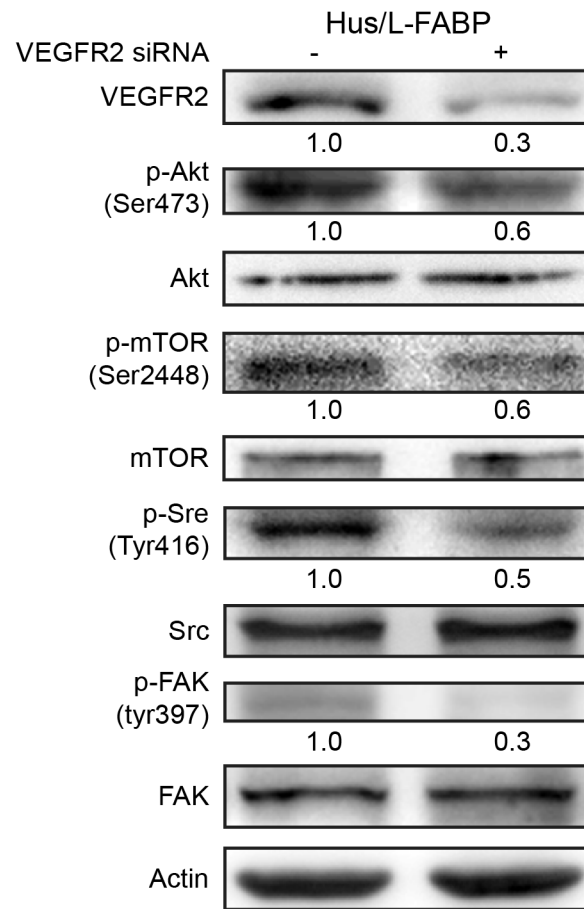

**Supplementary Figure S10: Knockdown of VEGFR2 in Hus/L-FABP cells decreased the activation of downstream signaling molecules.** Western blot analysis of the phosphorylation of signaling molecules including Akt, mTOR, Src, and FAK in Hus/L-FABP cells transfected with control siRNA or VEGFR2-targeting siRNA for 24 h.

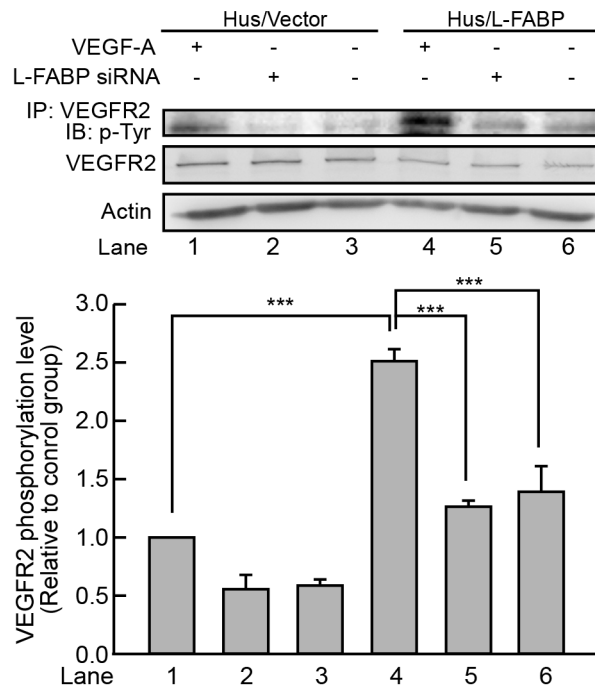

**Supplementary Figure S11: L-FABP was required for promotion of the activation of VEGFR2.** Hus/L-FABP and control cells were transfected with L-FABP siRNA or control siRNA for 24 h. After recovery, cells were then treated with VEGF-A (20 ng/ml, obtained from Sigma-Aldrich, USA) for 15 minutes, and immunoprecipitation and western blot analyses were performed (n=3, \*\*\*p < 0.001).

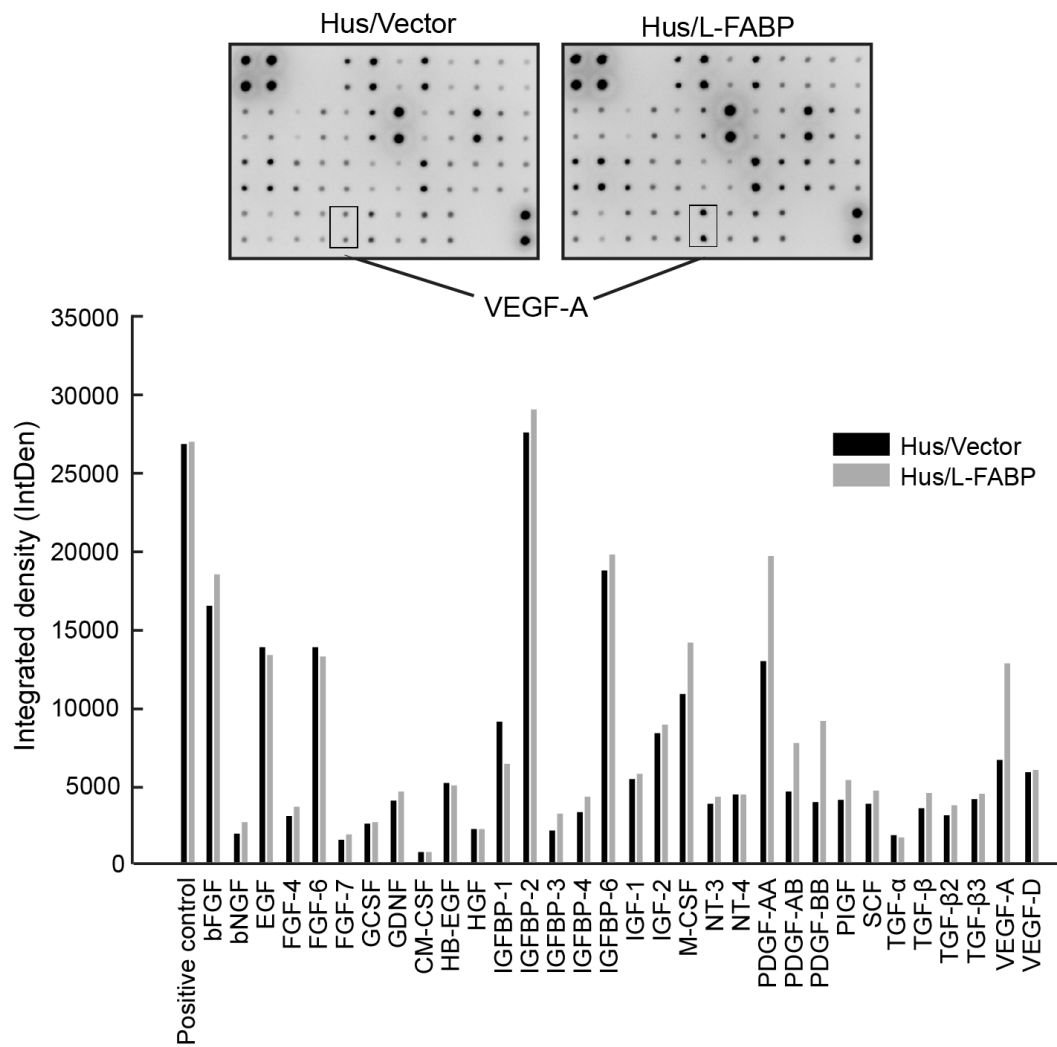

**Supplementary Figure S12: Secreted VEGF-A levels in L-FABP-overexpressing cells were increased in human growth factor antibody array analysis.** A human growth factor antibody array (#ab134002, Abcam, USA) was used to determine the amount of various growth factors secreted by L-FABP-overexpressing cells, and the results suggested that secreted levels of VEGF-A were elevated in Hus/L-FABP cells.

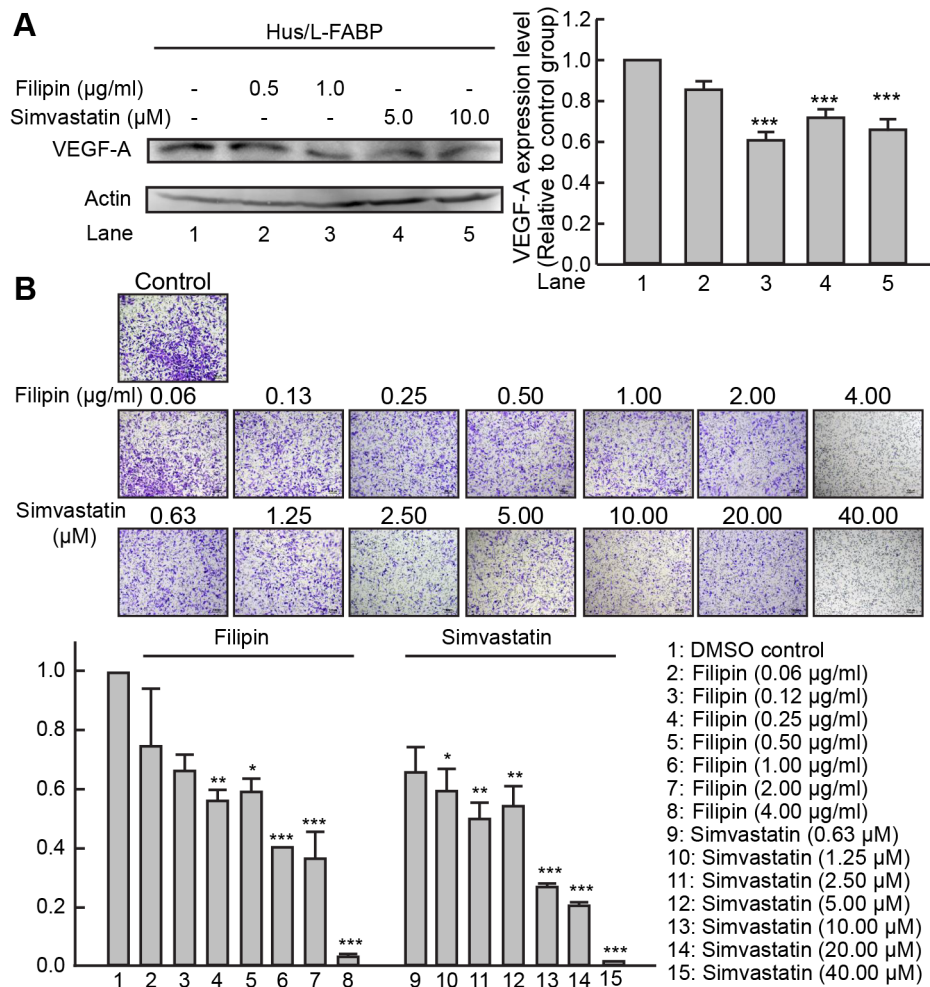

**Supplementary Figure S13: Filipin and simvastatin significantly inhibited VEGF-A expression and migration activity of L-FABP-overexpressing cells.** **A.** Western blot analysis of Hus/L-FABP cells treated with filipin (0.5 or 1.0 µg/ml) or simvastatin (5 or 10 µM) for 12 h. \*\*p < 0.01, \*\*\*p < 0.001 versus DMSO-treated control group. **B.** Migration activity of Hus/L-FABP cells treated with various concentrations of filipin and simvastatin for 12 h. \*p < 0.05, \*\*p < 0.01, \*\*\*p < 0.001 versus DMSO-treated control group.

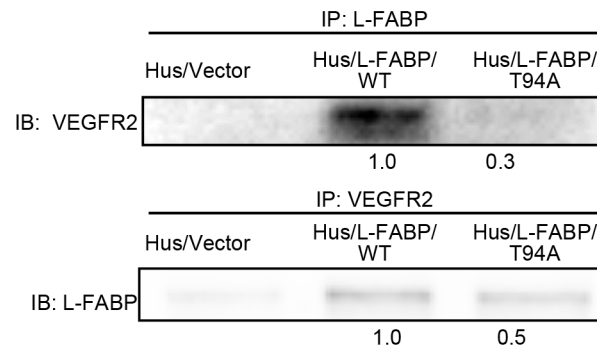

**Supplementary Figure S14: T94A mutation of L-FABP disrupted the association with VEGFR2.** Hus/L-FABP (wild-type), Hus/L-FABP (mutant, T94A), and Hus/Vector (vector-only control) cells were subjected to either immunoprecipitation (IP) with a VEGFR2 antibody followed by blotting with L-FABP or IP with an L-FABP antibody followed by blotting for VEGFR2.

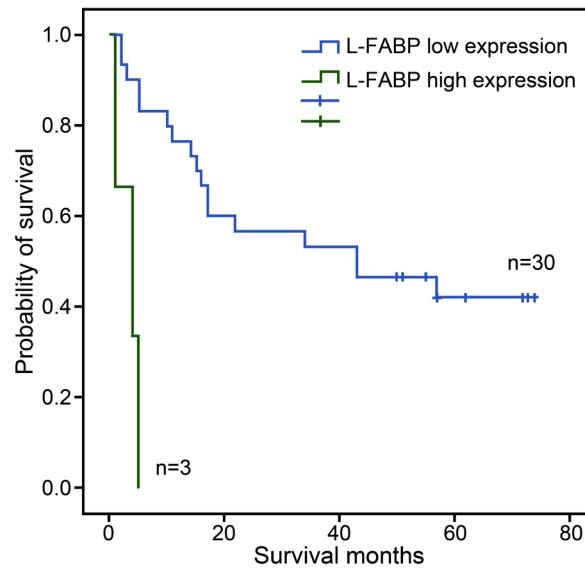

**Supplementary Figure S15: Aberrant overexpression of L-FABP in HCC tissues (with cirrhosis) was associated with worse survival outcome.** Kaplan-Meier survival curves demonstrate that the L-FABP high-expression group (n = 3) survived for fewer months than the L-FABP low-expression group (n = 30). \*\*\*p < 0.001.

**Supplementary Table S1: List of primers, siRNA, and shRNA used in this study****Primers (5' to 3'):****pcDNA 3.1/L-FABP cloning:**

1. L-FABP TOPO PCR primer (Forward): CAC CAT GAG TTT CTC CGG CAA G
2. L-FABP TOPO PCR primer (Reverse): AAT TCT CTT GCT GAT TCT C

**qRT-PCR:**

1. L-FABP primer (Forward): ATG AGT TTC TCC GGC AAG TAC
2. L-FABP primer (Reverse): TCC TTC CCC TTC TGG ATG AGC
3. VEGF-A primer (Forward): CAT GAA CTT TCT GCT GTC TTG G
4. VEGF-A primer (Reverse): CCT GGT GAG AGA TCT GGT TCC
5. 18S rRNA primer (Forward): GCT TAA TTT GAC TCA ACA CGG GA
6. 18S rRNA primer (Reverse): AGC TAT CAA TCT GTC AAT CCT GTC

**VEGF-A promoter cloning:**

1. D1 primer (Forward): GGG GTA CCC CGC TCC ACA AAC TTG GTG CC
2. D2 primer (Forward): GGG GTA CCC CGA GGG CTC CAG ATG GCA
3. D3 primer (Forward): GGG GTA CCC CGT CGA GCT TCC CCT TCA TTG
4. Reverse primer(−73): CCC TCG AGG GCG CCT CCC GAC AGA GCG CT

**ChIP analysis (-1041 to -750):**

Primer containing HIF-1 $\alpha$  element (Forward):

CAG GAA CAA GGG CCT CTG TCT

Primer containing HIF-1 $\alpha$  element (Reverse):

TGT CCC TCT GAC AAT GTG CCA TC

**Site-directed mutagenesis cloning:**

1. L-FABP F3W primer (Forward):  
ATG AGT TGG TCC GGC AAG TGG CAA CTG CAG
2. L-FABP F3W primer (Reverse):  
CTG CAG TTG CCA CTT GCC GGA CCA ACT CAT
3. L-FABP K31E primer (Forward):  
GAG CTC ATC CAG GAG GGG GAG GAT ATC AAG
4. L-FABP K31E primer (Reverse):  
CTT GAT ATC CTC CCC CTC CTG GAT GAG CTC
5. L-FABP T94A primer (Forward):  
CTG GTG ACA GCT TTC AAA AAC ATC
6. L-FABP T94A primer (Reverse):  
GAT GTT TTT GAA AGC TGT CAC CAG

**siRNA & shRNA (5' to 3')**

L-FABP siRNA (Invitrogen, FABP1HSS141976)

Primer number: 228624A01

(RNA)-GGU UCA GUU GGA AGG UGA CAA UAA A

Primer number: 228624A02

(RNA)-UUU AUU GUC ACC UUC CAA CUG AAC C

L-FABP shRNA (Academia Sinica, RNAi Core Lab)

Clone ID: TRCN0000059643

NM ID: NM\_001443

Vector: pLKO.1

Target sequence: GTG ACA ATA AAC TGG TGA CAA

Hairpin sequence: CCGG-GTGACAATAAACTGGTGACAA-CTCGAG-TTGTACCAGTTTATTGTAC-TTTTTG
